# Supplementary material
Source: publisher figshare collection journal article supplement (https://frontiersin.figshare.com/ndownloader/files/29067501)
Supplement: Supplementary file [file 29067501]

```

1
2
3 # -----
4 # Sample code to show use of JMBayes for joint longitudinal-survival modeling
5 # - as applied to simulated data (note, this runs as intended but does not
6 # provide convincing results due to limitations inherent to the simulated data)
7 # -----
8
9 # clear memory
10 rm(list=ls())
11
12 # load libraries
13 require(nlme)
14 require(survival)
15 require('JMBayes')
16
17 # load data
18 wd = "/path/to/your/data/directory/"
19 d = read.csv(paste(wd, 'S2_JMB_example_data.csv', sep=''), header =
TRUE)
20 str(d)
21
22 # Use age at testing, centered, as longitudinal time metric
23 d$Time = d$AgeTest - median(d$AgeTest)
24
25 # wide-format data for survival model (important that same IDs are present
26 # in long-format and wide format data, otherwise joint models won't work)
27 dW = unique(d[,c(1:7)])
28
29
30 # -----
31 # Multilevel change models
32 #     note that lme() uses REML estimation by default, which is preferred for
33 #     parameter estimates but not appropriate for model testing. For the latter,
34 #     models need to be fit with ML.
35 # -----
36
37 # intercept-only model
38 mlm_00 = lme(fixed = GF ~ 1 + AgeStart, random = ~ 1 | ID,
39             data = d,
40             method = "ML"
41             )
42
43 # + linear slope (fixed and random effects)
44 mlm_01 = lme(fixed = GF ~ 1 + Time + AgeStart, random = ~ 1 + Time | ID,
45             data = d,
46             method = "ML"
47             )
48
49 # which is the better fit?
50 anova(mlm_00, mlm_01)
51
52 # mlm_01 has better fit, so re-estimate with REML for param ests
53 mlm_01 = update(mlm_01, method = "REML")
54 summary(mlm_01)
55
56
57 # -----
58 # Cox proportional hazards survival model
59 # -----
60
61 srv_00 = Surv(dW$AgeLastObs, dW$Dead)
62 srv_01 = coxph(srv_00 ~ 1 + AgeStart + Female + Smoker,
63              data = dW,
64              x = TRUE,
65              model = TRUE
66              )
67 summary(srv_01)
68

```
